# Supplementary material for: Selective separation behavior of graphene flakes in interaction with halide anions in the presence of an external electric field
Source: Royal Society of Chemistry journal article supplement (doi:10.1039/c5cp07710a), 2016-01-01
Supplement: c5cp07710a1.pdf [file c5cp07710a1.pdf]

***Selective Separation Behavior of Graphene Flake in Interaction with Halide Anions in the Presence of External Electric Field***

E. Farajpour<sup>†</sup>, B. Sohrabi<sup>†,\*</sup>, J. Beheshtian<sup>‡</sup>

<sup>†</sup>Department of Chemistry, Surface Chemistry Research Laboratory, Iran University of Science and Technology, P.O. Box 16846-13114, Tehran, Iran.

<sup>‡</sup>Chemistry Department, Faculty of Sciences, Shahid Rajaei Teacher Training University, Lavizan, Tehran, Iran.

**Supporting Information**

| <b>Table S1. The HOMO, LUMO, and HOMO-LUMO band gap energies corresponding to the investigated molecular systems at the M06-2X/6-31G (d,p) level of theory.</b> |                                     |                                   |                                   |                                |
|-----------------------------------------------------------------------------------------------------------------------------------------------------------------|-------------------------------------|-----------------------------------|-----------------------------------|--------------------------------|
| <b>Molecular Complexes</b>                                                                                                                                      | <b>Electric Field Strength (au)</b> | <b>HOMO Orbital Energies (eV)</b> | <b>LUMO Orbital Energies (eV)</b> | <b>HOMO-LUMO Band Gap (eV)</b> |
| <b>C<sub>54</sub>H<sub>18</sub></b>                                                                                                                             | <b>0.0000</b>                       | <b>-5.95</b>                      | <b>-1.6</b>                       | <b>4.35</b>                    |
|                                                                                                                                                                 | <b>0.0005</b>                       | <b>-5.95</b>                      | <b>-1.6</b>                       | <b>4.35</b>                    |
|                                                                                                                                                                 | <b>0.0010</b>                       | <b>-5.95</b>                      | <b>-1.6</b>                       | <b>4.35</b>                    |
|                                                                                                                                                                 | <b>0.0015</b>                       | <b>-5.95</b>                      | <b>-1.6</b>                       | <b>4.35</b>                    |
|                                                                                                                                                                 | <b>0.0020</b>                       | <b>-5.95</b>                      | <b>-1.6</b>                       | <b>4.35</b>                    |
|                                                                                                                                                                 | <b>0.0030</b>                       | <b>-5.95</b>                      | <b>-1.6</b>                       | <b>4.35</b>                    |
| <b>C<sub>54</sub>H<sub>18</sub>F<sup>-</sup></b>                                                                                                                | <b>0.0000</b>                       | <b>-2.42</b>                      | <b>1.02</b>                       | <b>3.44</b>                    |
|                                                                                                                                                                 | <b>0.0005</b>                       | <b>-2.45</b>                      | <b>1.01</b>                       | <b>3.46</b>                    |
|                                                                                                                                                                 | <b>0.0010</b>                       | <b>-2.46</b>                      | <b>1.01</b>                       | <b>3.47</b>                    |
|                                                                                                                                                                 | <b>0.0015</b>                       | <b>-2.47</b>                      | <b>1.01</b>                       | <b>3.48</b>                    |
|                                                                                                                                                                 | <b>0.0020</b>                       | <b>-2.47</b>                      | <b>1.01</b>                       | <b>3.48</b>                    |
|                                                                                                                                                                 | <b>0.0030</b>                       | <b>-2.49</b>                      | <b>1.00</b>                       | <b>3.49</b>                    |
| <b>C<sub>54</sub>H<sub>18</sub>Cl<sup>-</sup></b>                                                                                                               | <b>0.0000</b>                       | <b>-2.13</b>                      | <b>0.73</b>                       | <b>2.86</b>                    |
|                                                                                                                                                                 | <b>0.0005</b>                       | <b>-2.14</b>                      | <b>0.69</b>                       | <b>2.83</b>                    |
|                                                                                                                                                                 | <b>0.0010</b>                       | <b>-2.19</b>                      | <b>0.70</b>                       | <b>2.89</b>                    |
|                                                                                                                                                                 | <b>0.0015</b>                       | <b>-2.23</b>                      | <b>0.69</b>                       | <b>2.92</b>                    |
|                                                                                                                                                                 | <b>0.0020</b>                       | <b>-2.92</b>                      | <b>0.23</b>                       | <b>3.15</b>                    |
|                                                                                                                                                                 | <b>0.0030</b>                       | <b>-2.93</b>                      | <b>0.23</b>                       | <b>3.16</b>                    |
| <b>C<sub>54</sub>H<sub>18</sub>Br<sup>-</sup></b>                                                                                                               | <b>0.0000</b>                       | <b>-1.81</b>                      | <b>0.73</b>                       | <b>2.54</b>                    |
|                                                                                                                                                                 | <b>0.0005</b>                       | <b>-1.86</b>                      | <b>0.70</b>                       | <b>2.56</b>                    |
|                                                                                                                                                                 | <b>0.0010</b>                       | <b>-1.91</b>                      | <b>0.70</b>                       | <b>2.61</b>                    |
|                                                                                                                                                                 | <b>0.0015</b>                       | <b>-1.95</b>                      | <b>0.69</b>                       | <b>2.64</b>                    |
|                                                                                                                                                                 | <b>0.0020</b>                       | <b>-1.98</b>                      | <b>0.65</b>                       | <b>2.63</b>                    |
|                                                                                                                                                                 | <b>0.0030</b>                       | <b>-2.09</b>                      | <b>0.65</b>                       | <b>2.74</b>                    |
